# Supplementary material for: Chromosomal Aberration t(14;17)(q32;q21) Simultaneously Activates HOXB5 and miR10a in Triple-Hit B-Cell Lymphoma
Source: MDPI journal article supplement (doi:10.3390/biomedicines11061758), 2023-06-19
Supplement: s1 [file s1]

# IGH: 14q32

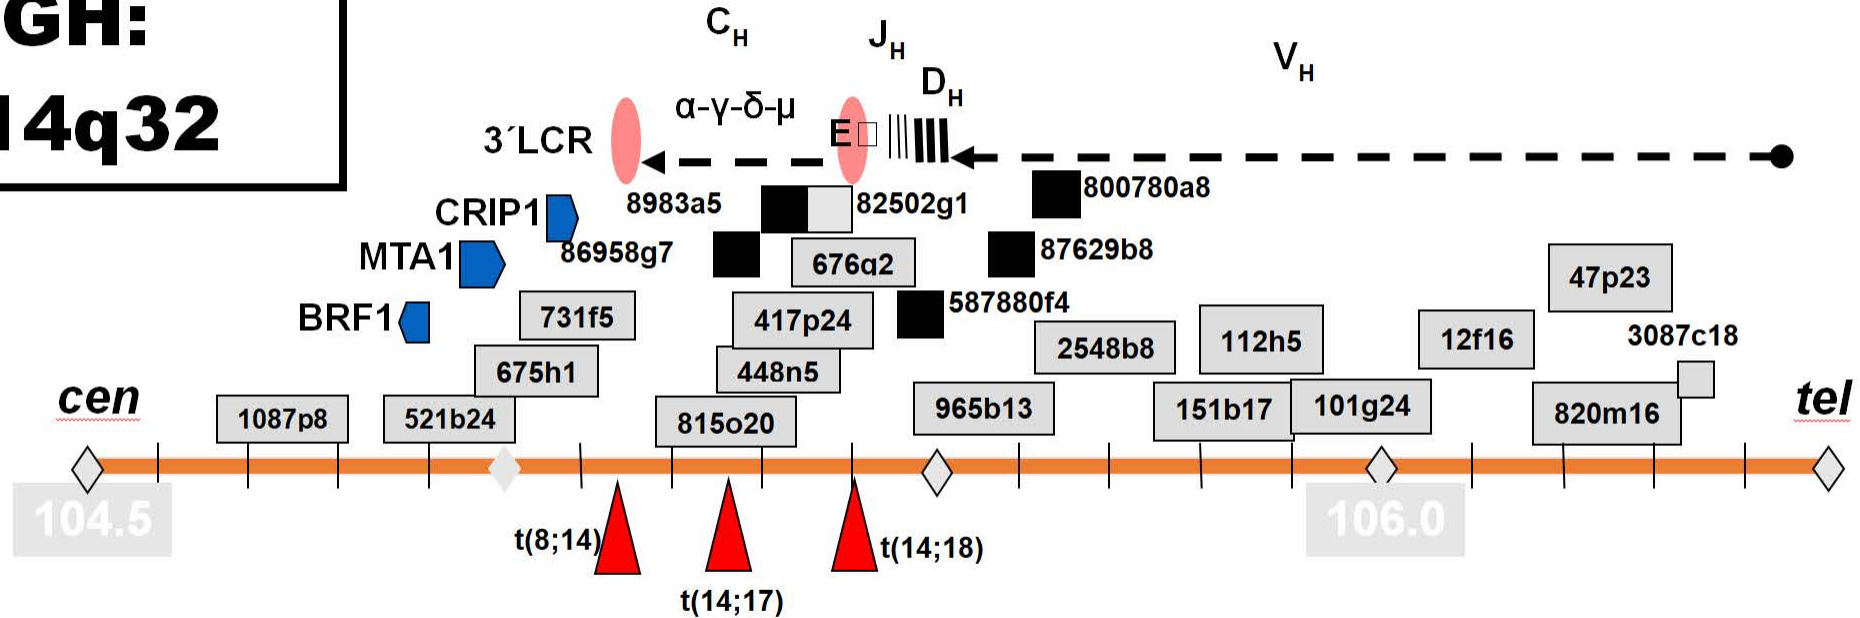

Supplementary Figure 1: FISH analysis of the IGH locus at 14q32.

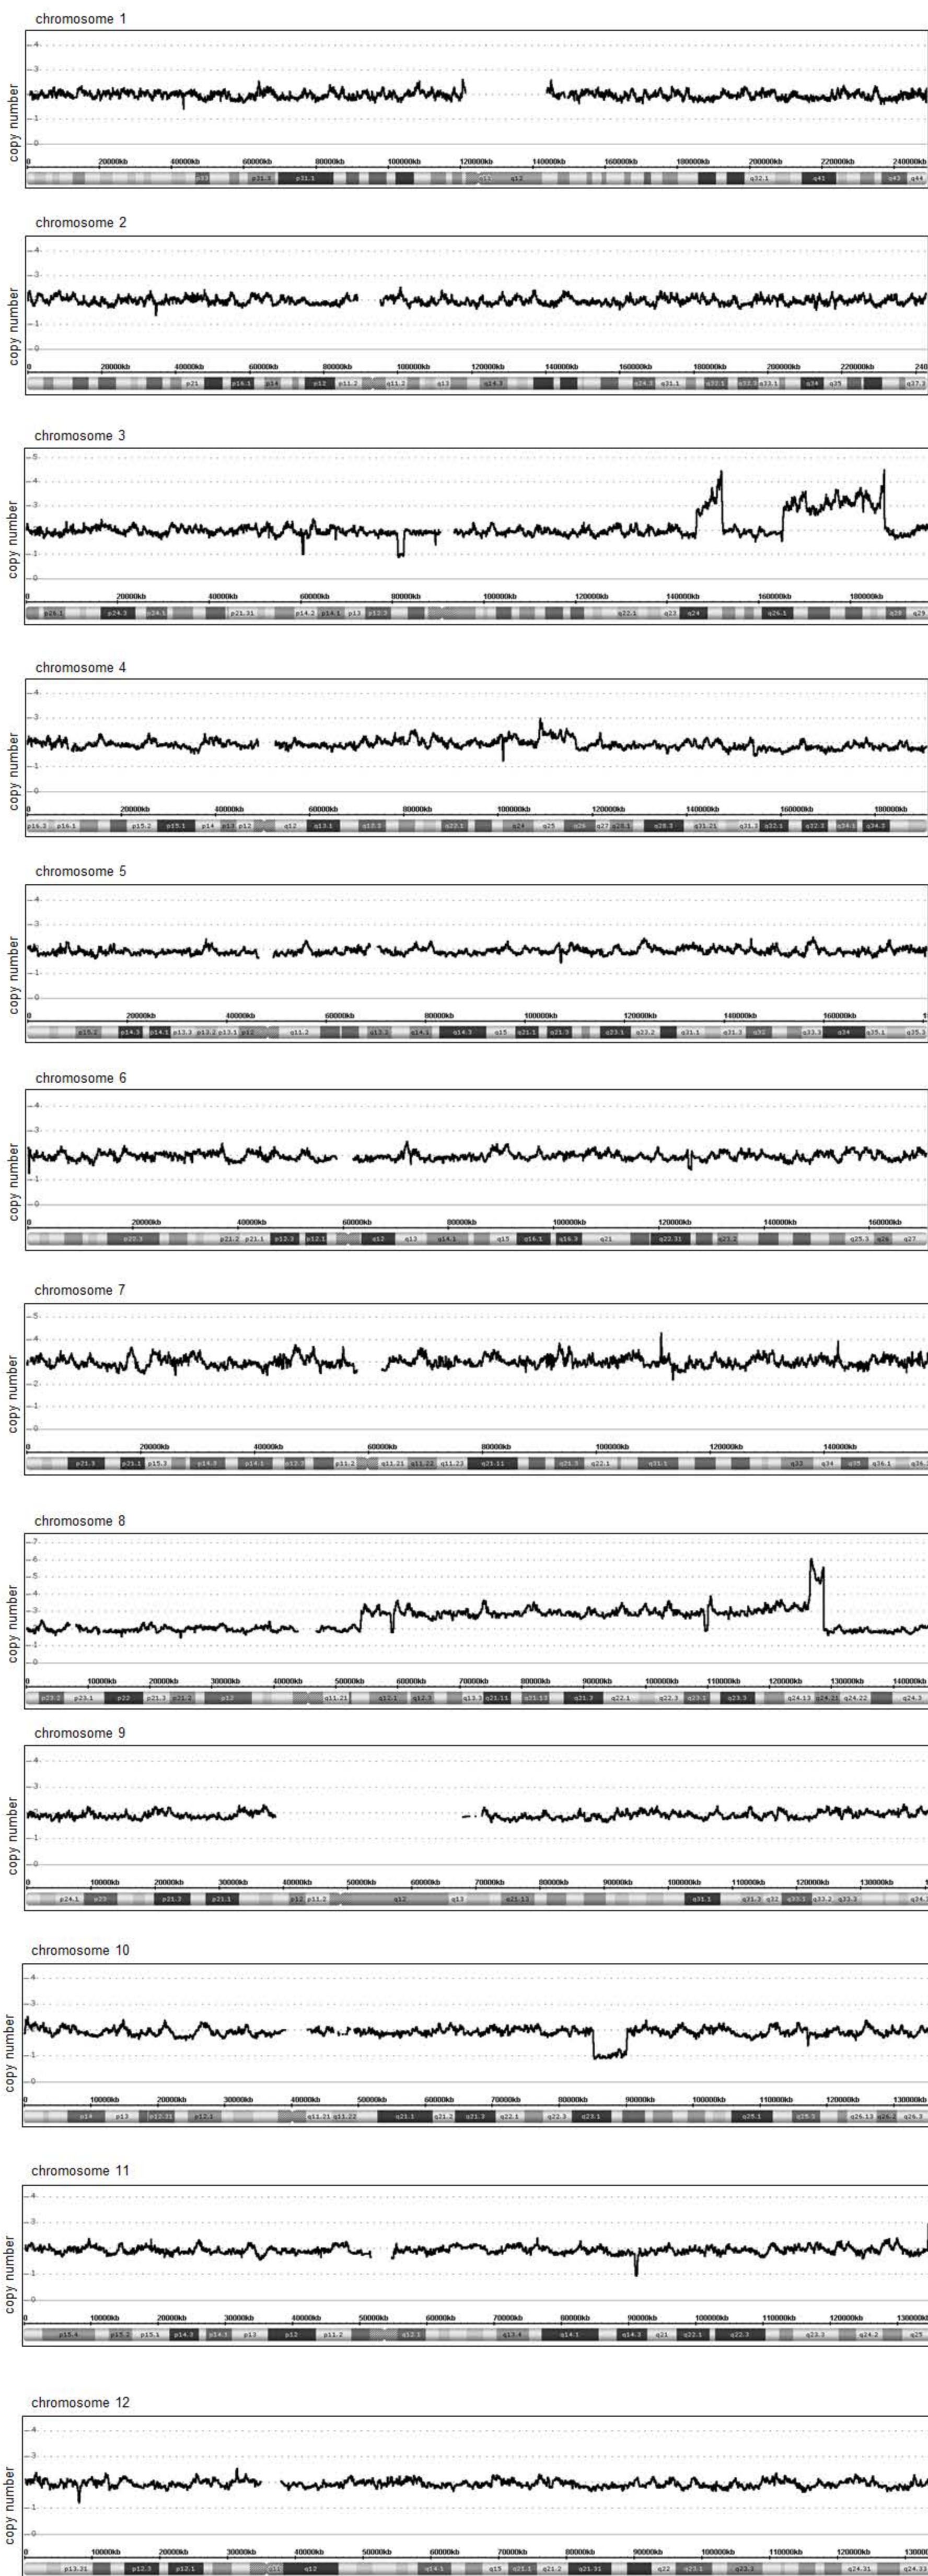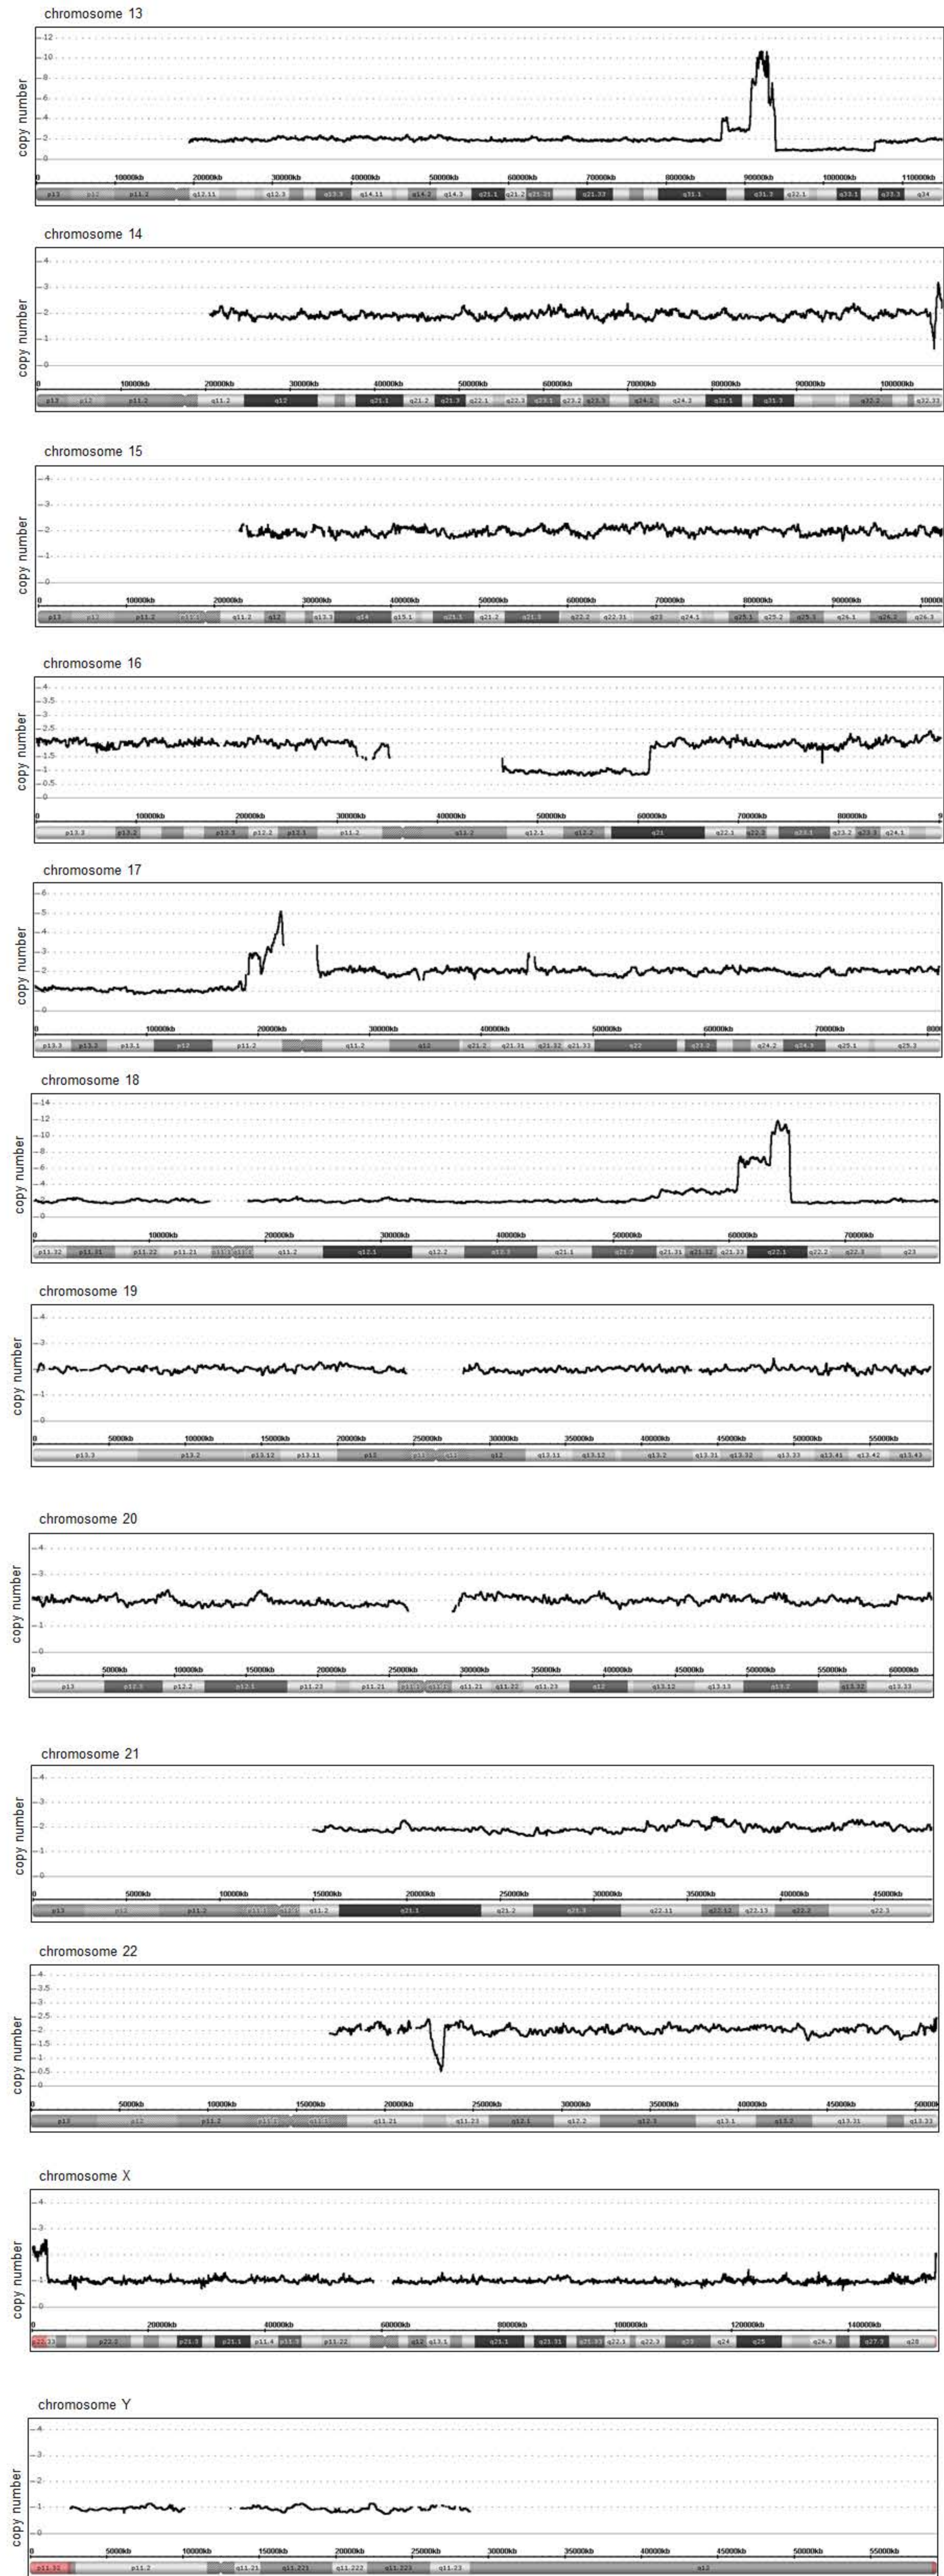

Supplementary Figure 2: Copy number analysis of SC-1.

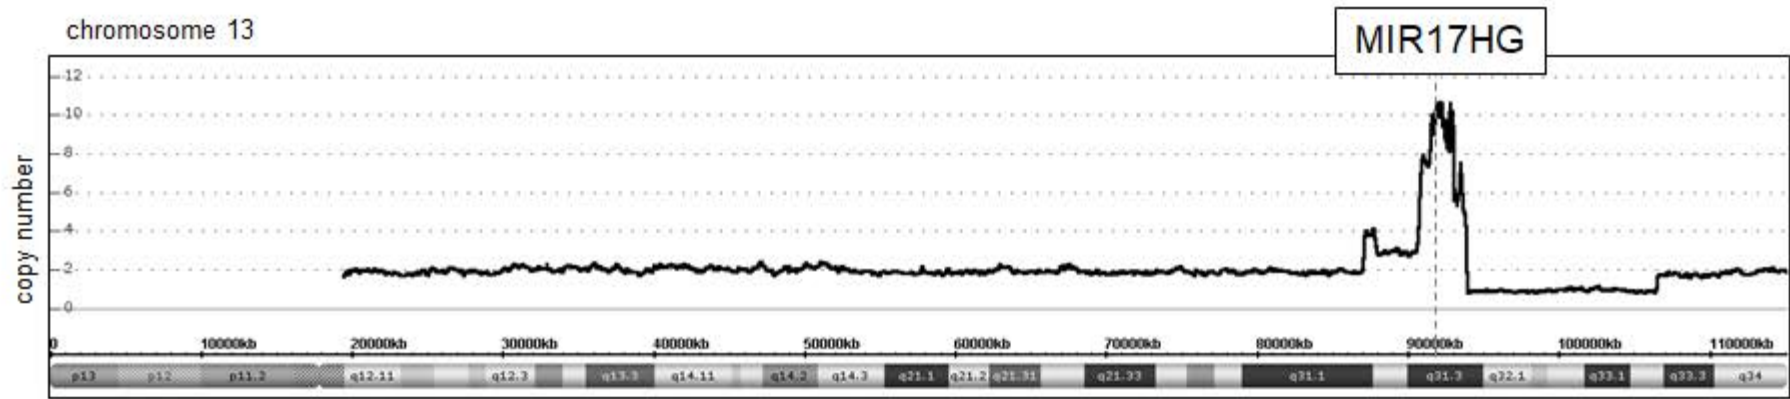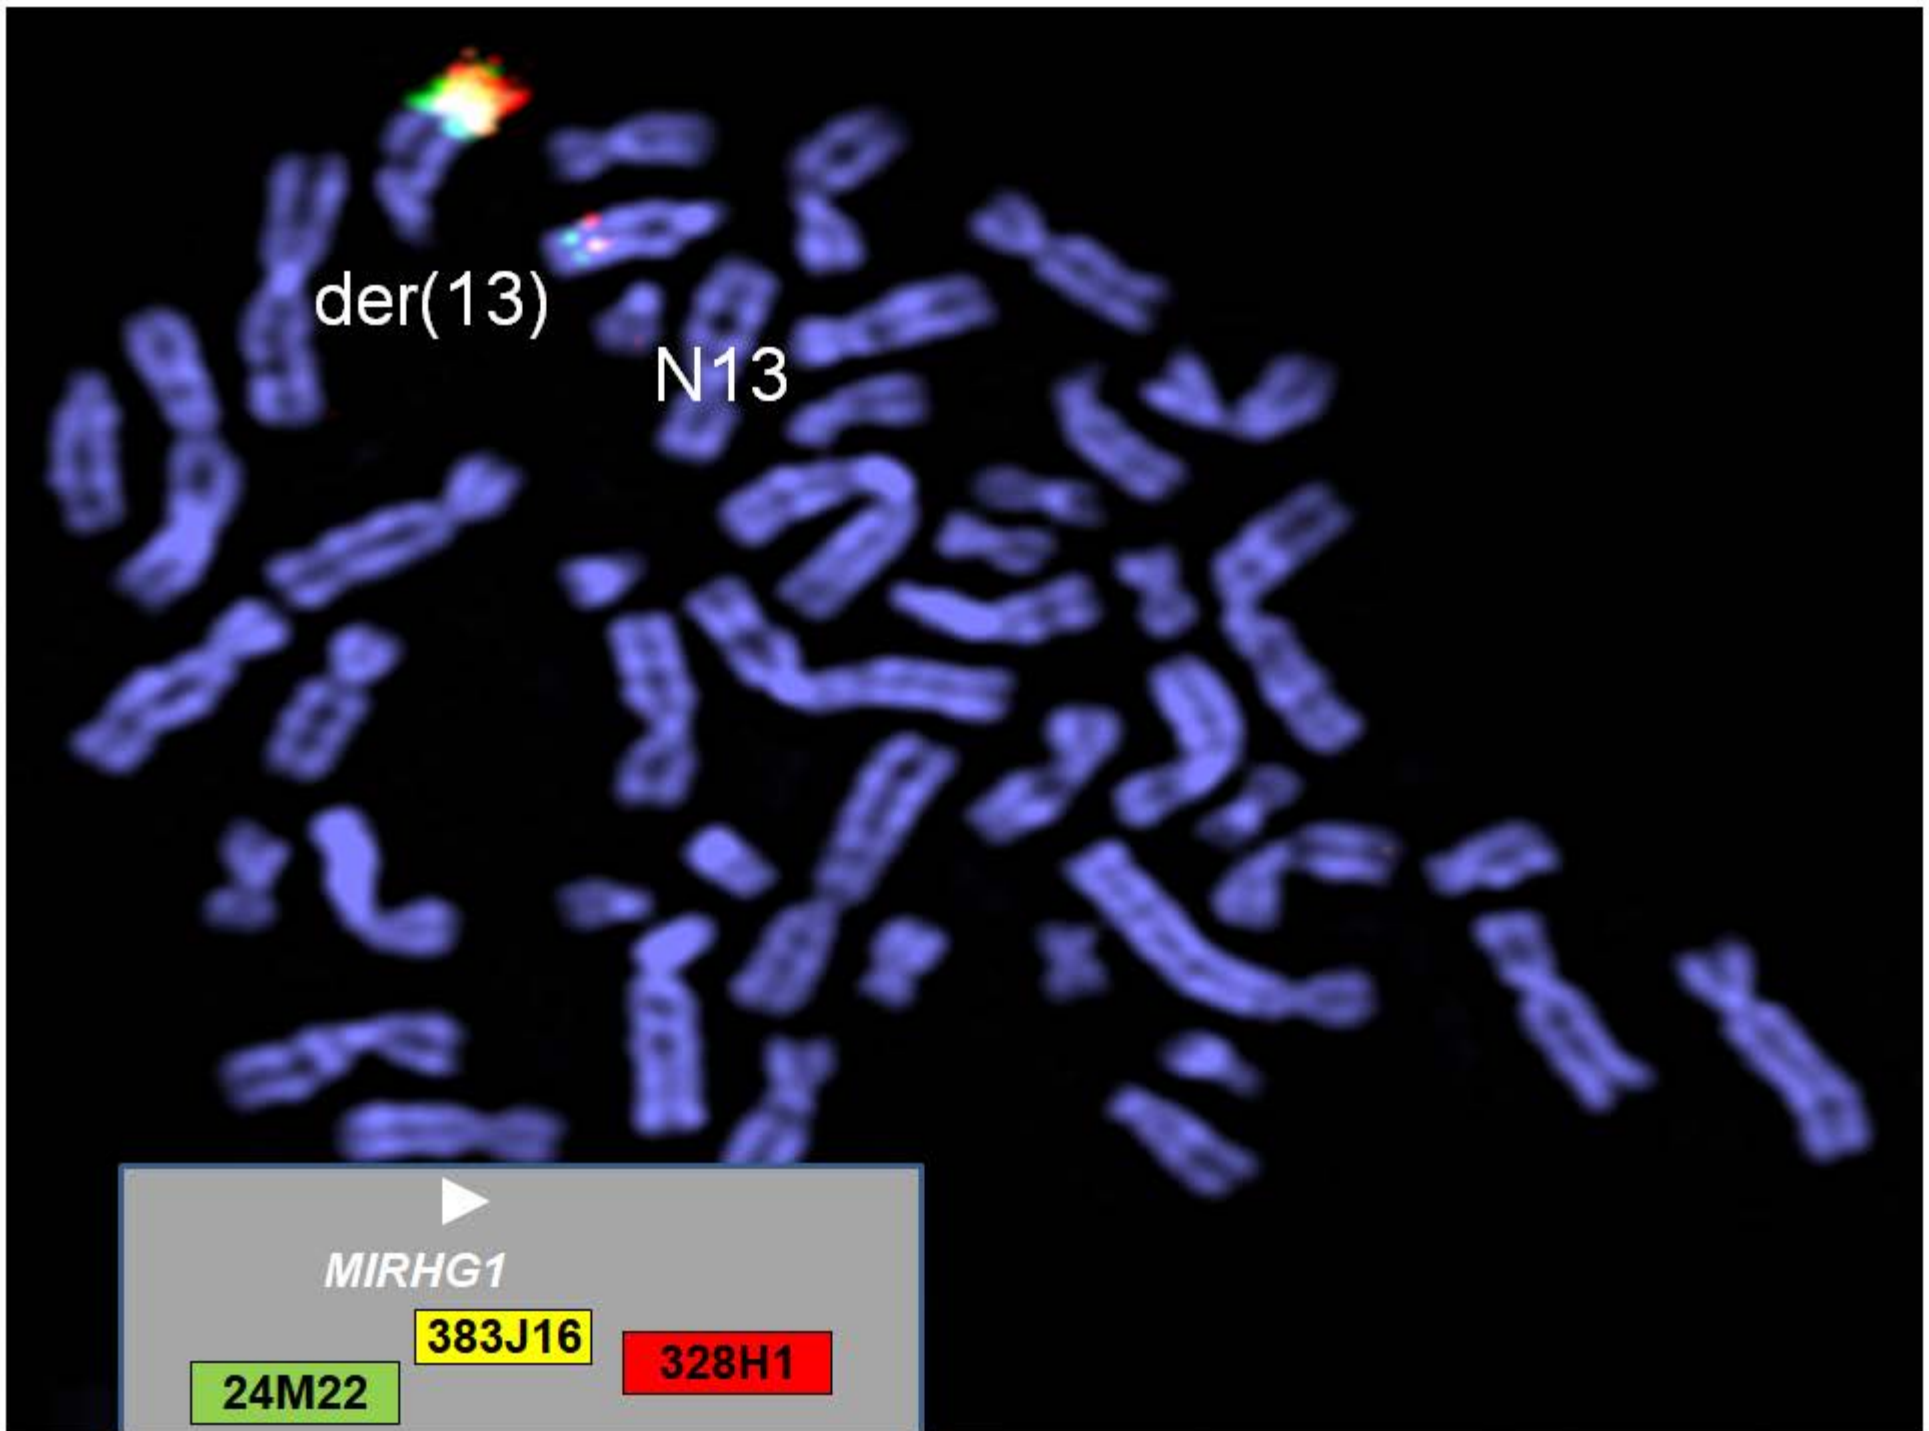

**Supplementary Figure 3:** Copy number data of SC-1 for MIR17HG (above). FISH analysis of MIR17HG in SC-1 (below). Used probes and their colors are indicated.

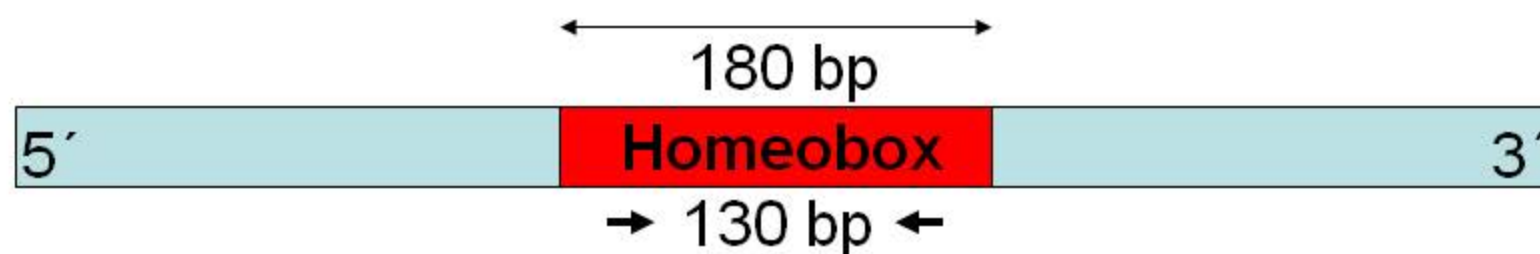

### Forward-Primer Design

| HOMEBOX |                                                                              |
|---------|------------------------------------------------------------------------------|
|         | G C C C C                                                                    |
|         | G G G G G                                                                    |
|         | A A A A A                                                                    |
|         | GCAGATATCGGA CTGGAG TT                                                       |
| L2      | AAGCCGCGCAGCTCCTTTTCCCGGGTGCAGATCTGCGAGCTGGAAAAGCGCTTCCATCGCCAGAAGTACCTGGC   |
| HLXB9   | CGGCCGCGCACCCTTTCACAGCCAGCAGCTGCTGGAGCTGGAGCACCAGTTCAAGTTCAACAAGTACCTGTC     |
| EVX     | CGTTACCGCACCCTTTCACCCGAGAGCAGATTGCGCGGCTGGAGAAAGGAATTTCTACCGGGAGAATACGTATC   |
| CSX     | TTCTCGCAGGCGCAGGTCTATGAGCTGGAGCGGGCTTCAAGCAGCAGCGGTACCTGTC                   |
| HOXA9   | AAAGCGGTGCCCCCTATACAAAACACCAGACCTGGAACTGGAGAAAAGAGTTTCTGTTCAACATGTACCTCAC    |
| HOXA11  | AAAAAGCGCTGCCCTTATACAAAGTACCAGATCCGAGAGCTGGAAACGGGAGTTCTTCTTCAGCGTCTACATTAA  |
| HOXB7   | CGAGGCCGCGCAGACCTACACCCGCTACCAGACCTGGAGCTGGAGAAAAGAAATTTCACTACAATCGCTACCTGAC |
| HOXC6   | CGCGGCCGCGCAGATCTACTCGCGGTACCAGACCTGGAACTGGAGAAAGGAATTTCACTTCAATCGCTACCTAAC  |
| HOXC12  | CAACTGGCAGAGCTGGAGGGCGAGTTTCTGGTCAACGAGTTTATCAC                              |
| HOXD1   | GCACGAATTTTCAGCACCAGCAAGCAACTGACAGAACTGGAAAAAGAGTTTCAATTCAATAAGTACTTAAC      |
| HOXD13  | AAGAAGAGAGTGCCTTACACCAAAGTGCAGCTTAAAGAACTGGAGAACGAGTATGCCATTAACAAATTCATTAA   |
| DLX1    | AAACCCAGGACGATTTATTCAGTTTGCAGTTGCGAGGCTTTGAAACCGGAGGTTCCAGCAAACTCAGTACCTAGC  |
| DLX3    | AAGCCGCGTACAATCTACTCCAGCTACCAGCTGGCCGCCCTGCGAGCGCGCTTCCAGAAAGGCCAGTACCTGGC   |
| EN1     | CGGCCGCGGACCGGCTTACCGCCGAGCAGCTGCAGAGACTCAAGGGCGGAGTTCCAGGCAAAACCGCTACATCAC  |
| MEIS1   | GGCATTTTCCCAAAGTAGCAACAAATATCATGAGAGCATGGCTCTTCCAGCATCTCACACATCCGTACCCCTTC   |
| ENK     | AAACAGAAGACCAGAACTGTGTTCTCTTCCACCCAGCTGTGTGTACTCAATGATA                      |

### Reverse-Primer Design

|                                                                            | A                             | A A A |
|----------------------------------------------------------------------------|-------------------------------|-------|
|                                                                            | G                             | G     |
|                                                                            | T                             | T T T |
|                                                                            | C                             | C C C |
|                                                                            | AA AT TGGTT CAGAACC G GAATTCG |       |
| CTCGCCAAGTCCCTCAAAATGACGGACGCGCAGGTCAAGACCTGGTTCCAAAACCGAGGACCAAGTGGCGG    |                               |       |
| GTGGCCACCTCGCTCATGCTCACCGAGACCCAGGTGAAGATTGGTTCCAGAACC GCGGATGAAATGGAAA    |                               |       |
| CTGGCGGCCGCTTAAACCTGCCGGAACACCATCAAGGTGTGGTTCCAGAACC GCGCATGAAGGACAAG      |                               |       |
| CTGGCCAGCGTGTGAACTCACGTCCAGCAGGTCAAGATCTGGTTCCAGAACC GCGCTACAAGTGCAAG      |                               |       |
| GTGGCTCGACTGCTCAACCTCACCGAGAGGCAGGTCAAGATCTGGTTCCAGAACC GCGAGGATGAAATGAAG  |                               |       |
| CTGTCCCGCATGCTCAACCTCACTGATCGTCAAGTCAAAATCTGGTTCCAGAACC GAGAGAATGAAGGAAAAA |                               |       |
| ATCGCGCACACGCTCTGCCTCACGGAAAGACAGATCAAGATTGGTTCCAGAACC GCGCATGAAGTGGAAA    |                               |       |
| ATCGCCAACGCGCTTTGCCTGACCGAGCGACAGATCAAAATCTGGTTCCAGAACC GCGGATGAAGTGGAAA   |                               |       |
| CTCTCAGACCGCTTGAATCTTAGTGACCGCAGGTCAAGATCTGGTTCCAGAACC GAGAAATGAAAAAGAAA   |                               |       |
| ATAGCCAACCTGCTTGCACCTGAATGACACGCAAGTCAAAATCTGGTTCCAGAACC GAGGATGAAACAGAAAG |                               |       |
| ATCTCGGCTGCTACGAACCTATCTGAGAGACAAGTGACCATTTGGTTCCAGAACC GAAAGTGAAAGGACAAG  |                               |       |
| CTCGCGGCTCTTTGGGACTCACACAGACTCAGGTCAAGATCTGGTTCCAAAACAAGCGATCCAAGTTCAAG    |                               |       |
| CTGGCCGCGCAGCTGGGCTCACGACAGACAGGTGAAATCTGGTTCCAGAACC GCGCTTCCAAGTTCAAG     |                               |       |
| CTGGCCAGGAATCAGCCTCAACGAGTCCCAGATCAAGATCTGGTTCCAGAACAAGCGCGCCAAGATCAAG     |                               |       |
| TTAGCGCAAGACAGGACTTACAATTCTCAAGTAAACAAGTGGTTTATTAATGCCAGAAGAAGA            |                               |       |
| CCTCAGCCTCCAGCAGATGCAAGAATCTCCAACATCCTGAACCTCAGCTACAAACAGGTGAAGACCTGGTTC   |                               |       |

| SC-1     |               |             |    |      |
|----------|---------------|-------------|----|------|
| Clone No | Homeobox gene | Frequencies |    |      |
| 1        | HOXA4         | HOXB5       | 5x | 31 % |
| 2        | HOXB6         | HOXA4       | 4x |      |
| 3        | HLXB9         | HLXB9       | 4x |      |
| 4        | HOXA4         | HOXA1       | 2x |      |
| 5        | HOXA1         | HOXB6       | 1x | 6 %  |
| 6        | HOXA4         |             |    |      |
| 7        | HOXB5         |             |    |      |
| 8        | HLXB9         |             |    |      |
| 9        | HOXB5         |             |    |      |
| 10       | HOXA4         |             |    |      |
| 11       | HOXB5         |             |    |      |
| 12       | HLXB9         |             |    |      |
| 13       | HOXB5         |             |    |      |
| 14       | HOXA1         |             |    |      |
| 15       | HLXB9         |             |    |      |
| 16       | HOXB5         |             |    |      |

**Supplementary Figure 4:** RT-PCR screening approach and results for expressed homeobox genes in SC-1 using degenerate oligonucleotides.

Hematopoietic cell lines (GSE57083)

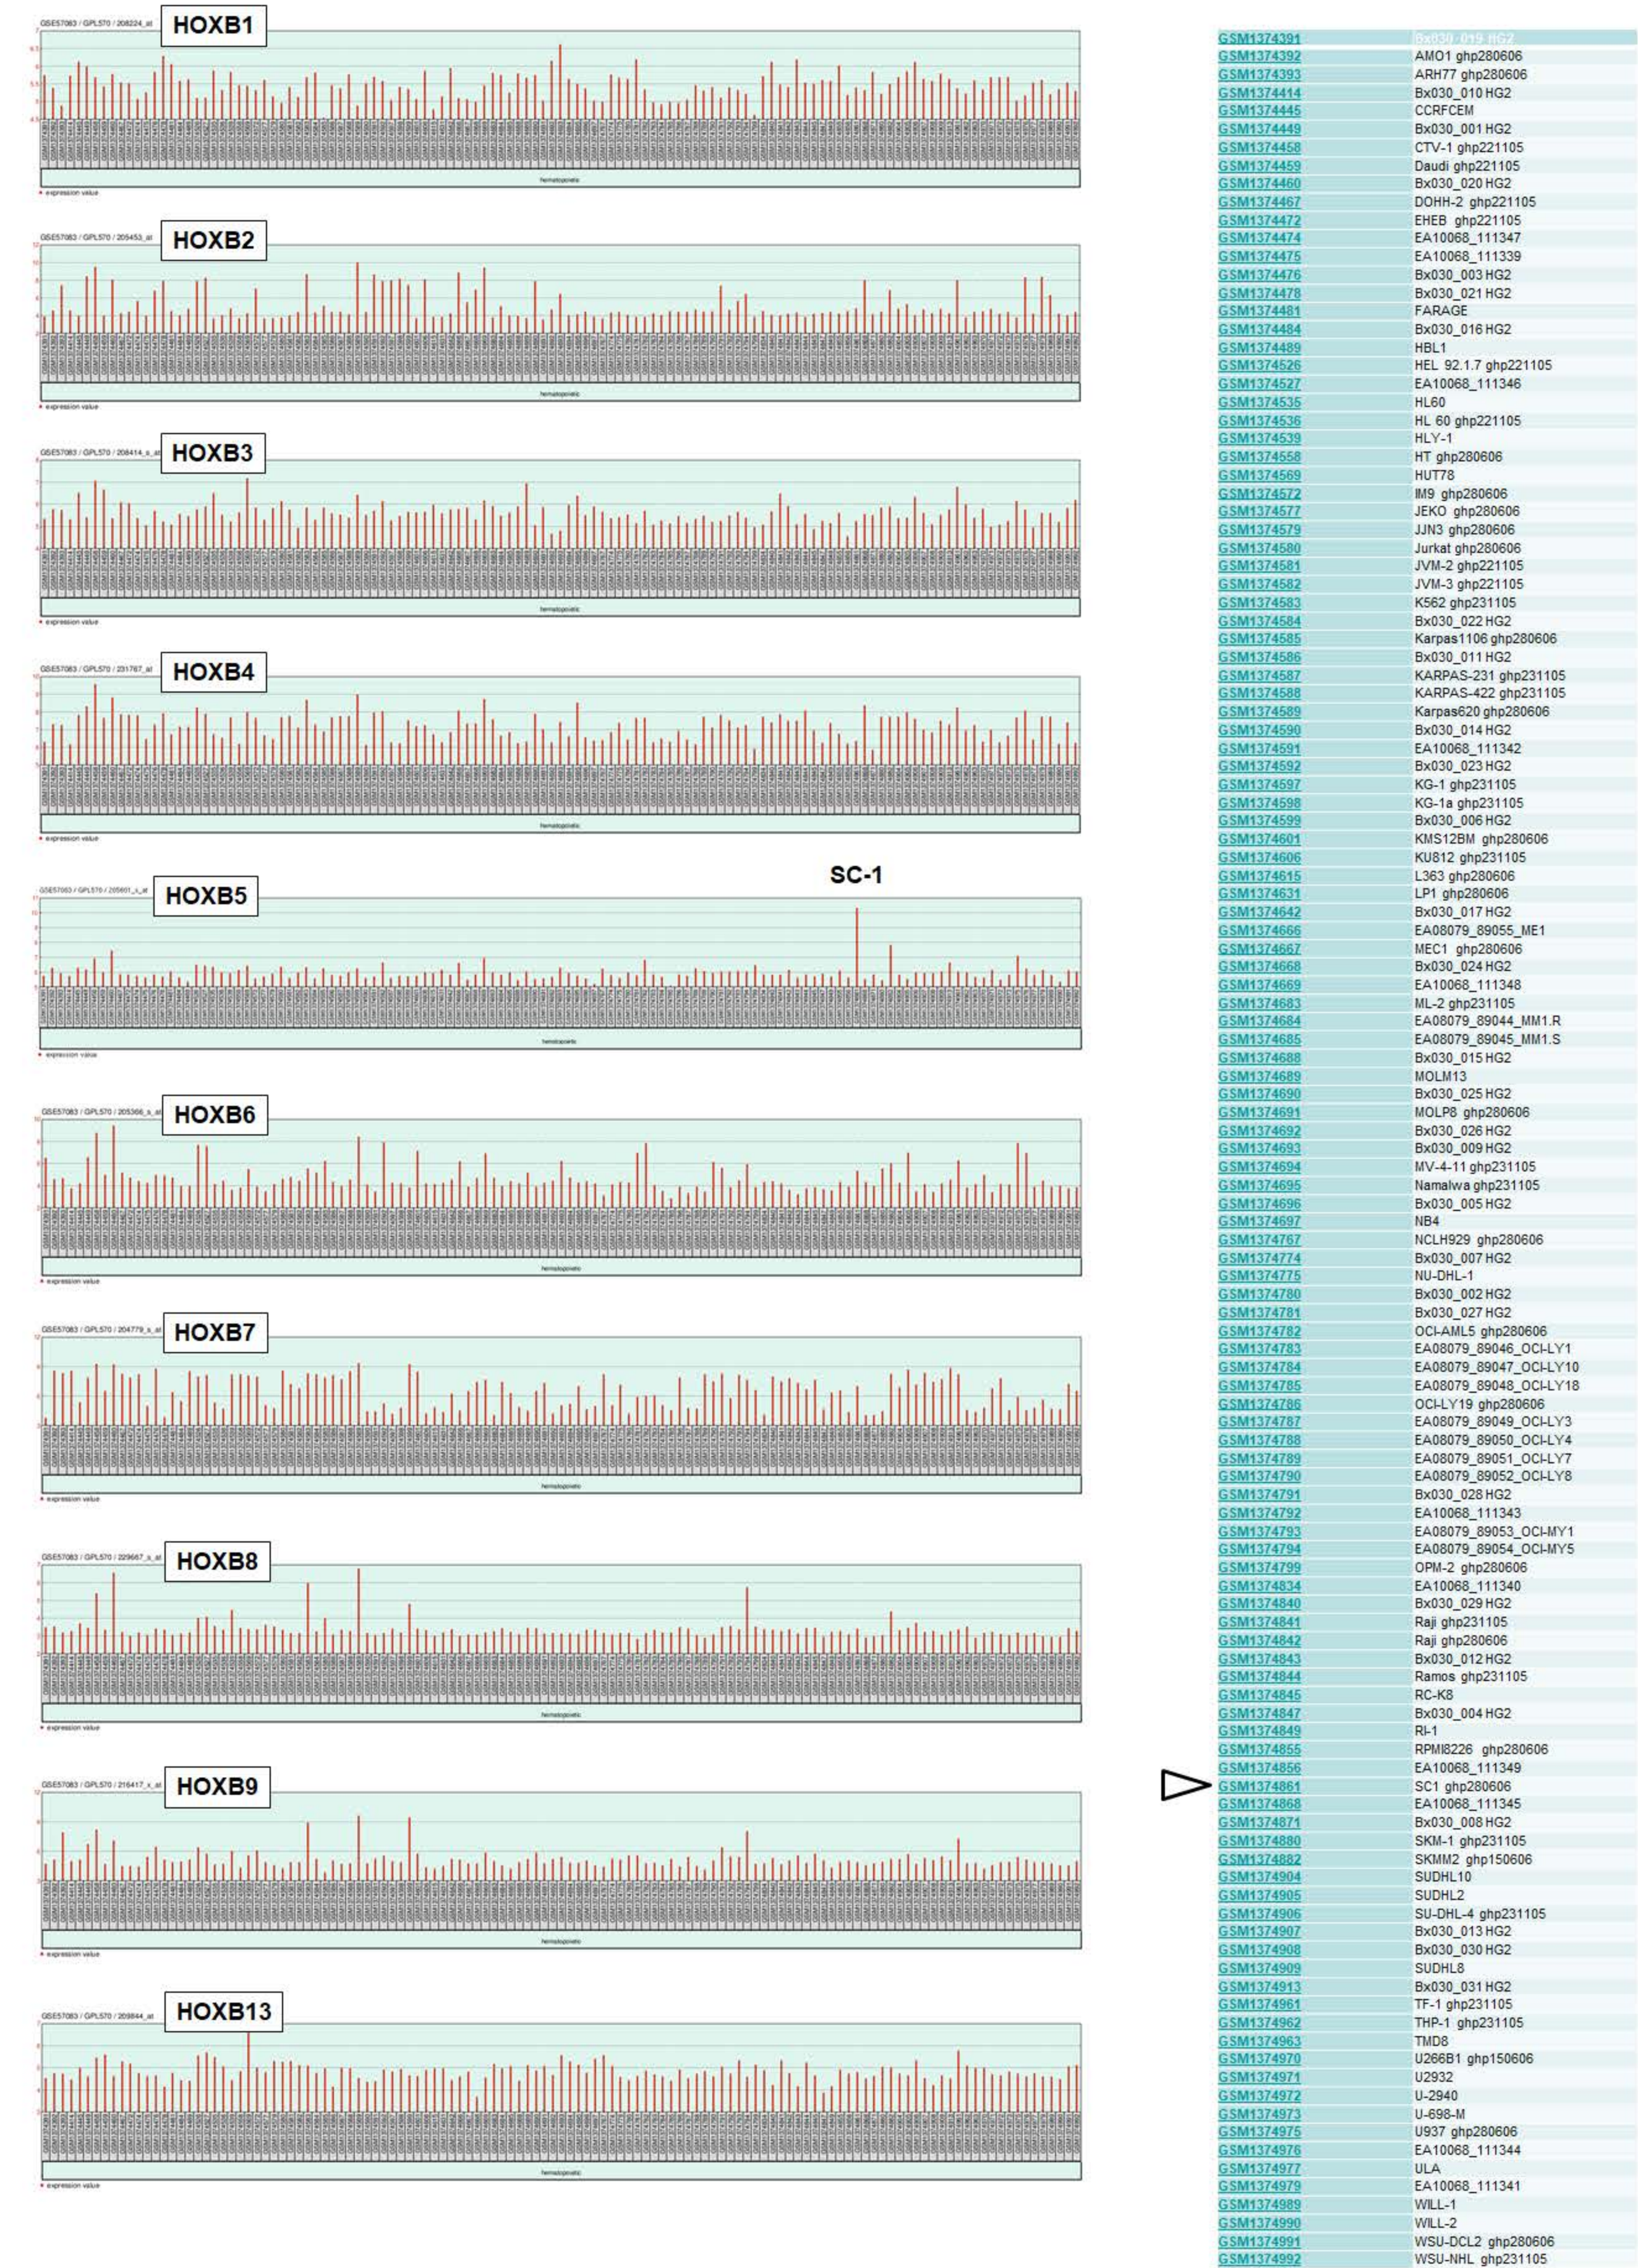

Supplementary Figure 5: Expression profiling data for HOXB genes in 114 hematopoietic cell lines including SC-1 (dataset GSE57083).

BCP-ALL (GSE13576)

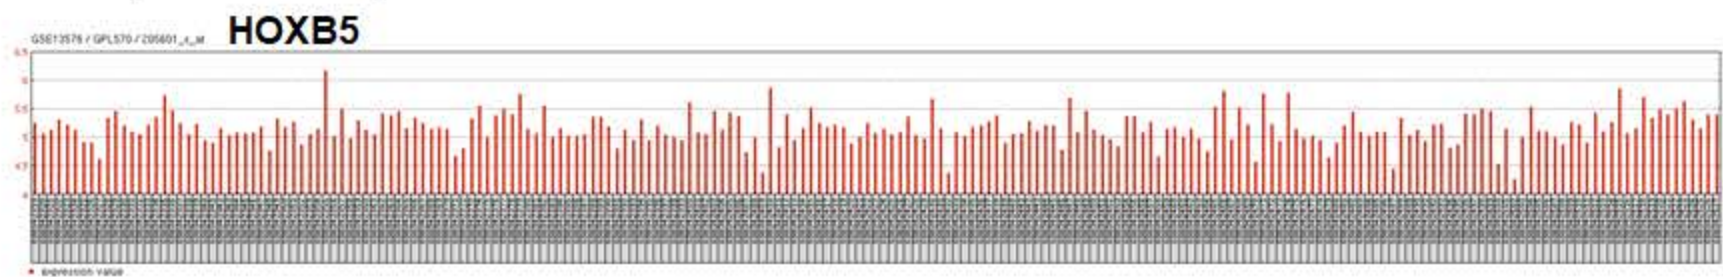

BL (GSE168422)

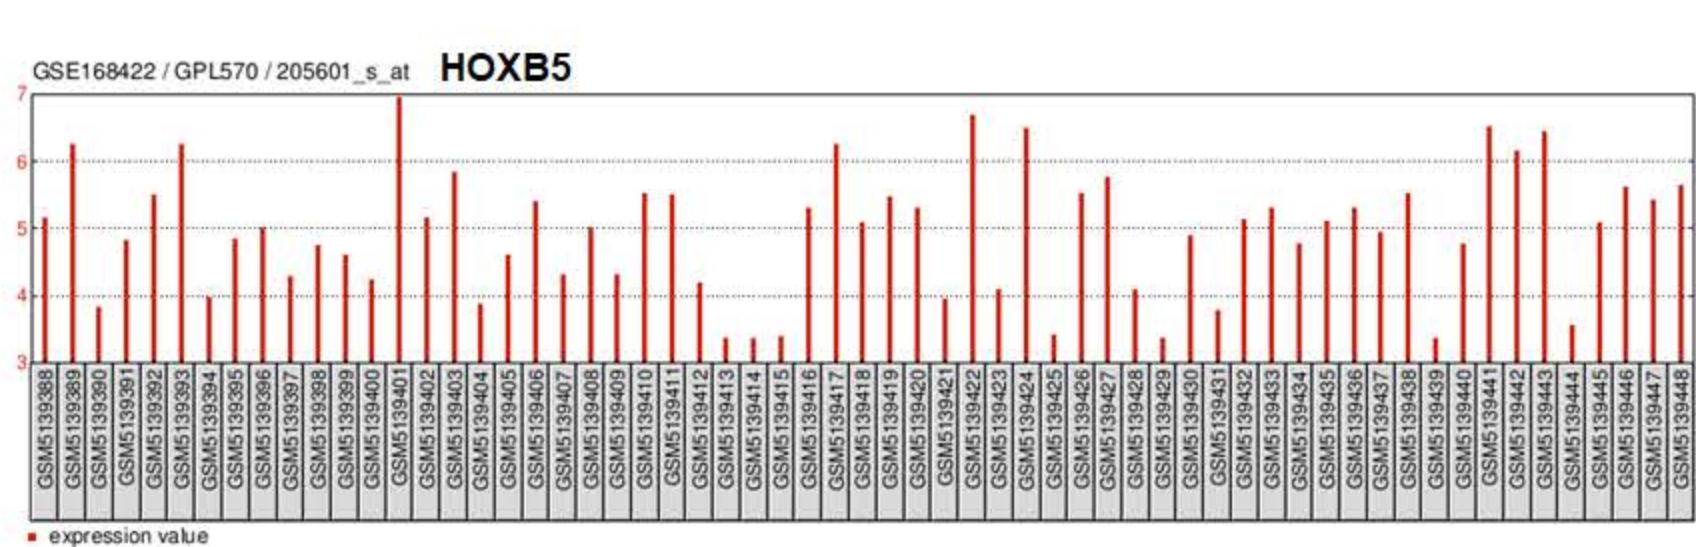

DLBCL (GSE53786)

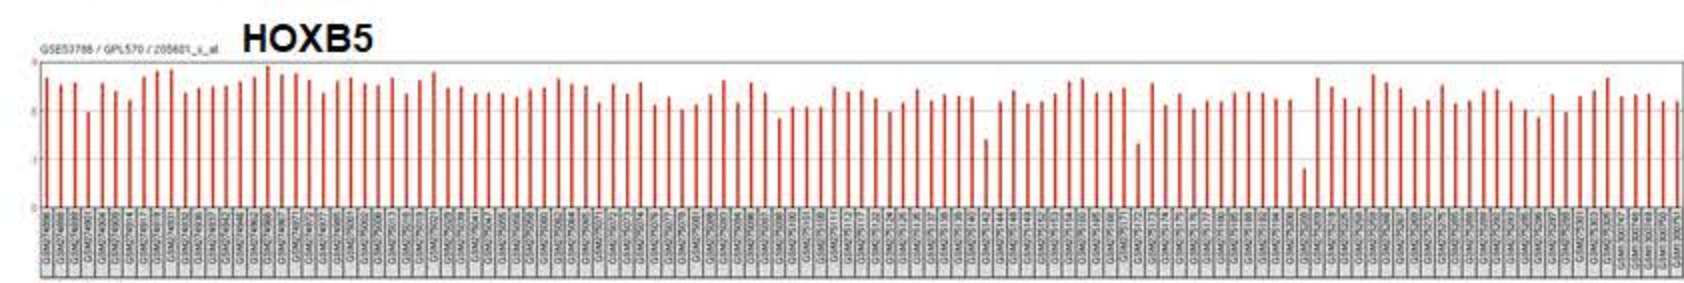

FL (GSE56311)

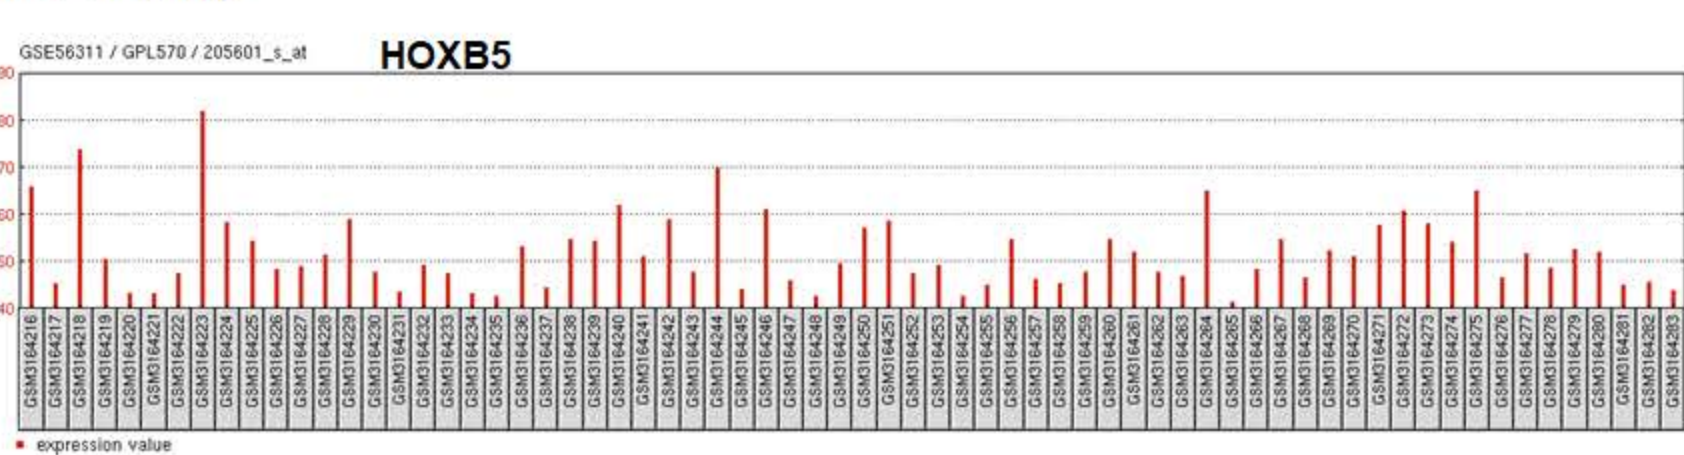

HL (GSE12453)

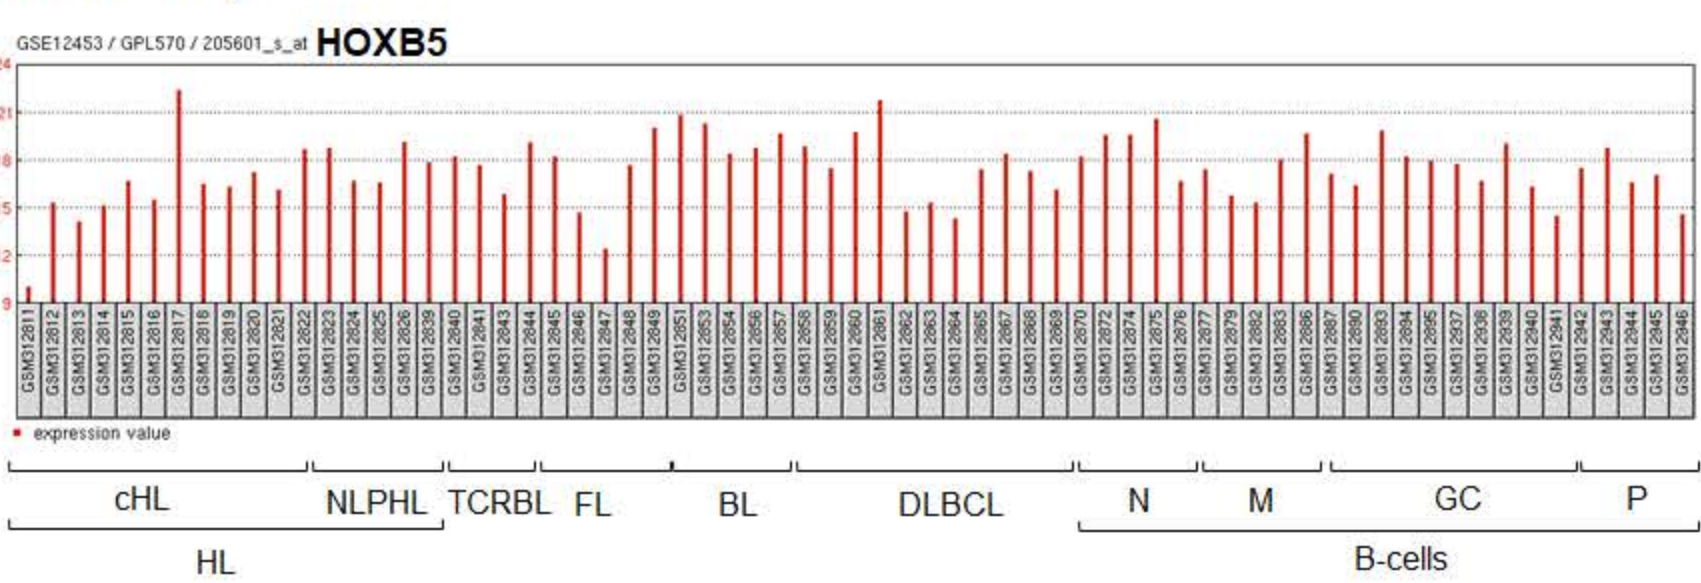

MCL, HCL, SMZL, CLL, FL (GSE16455)

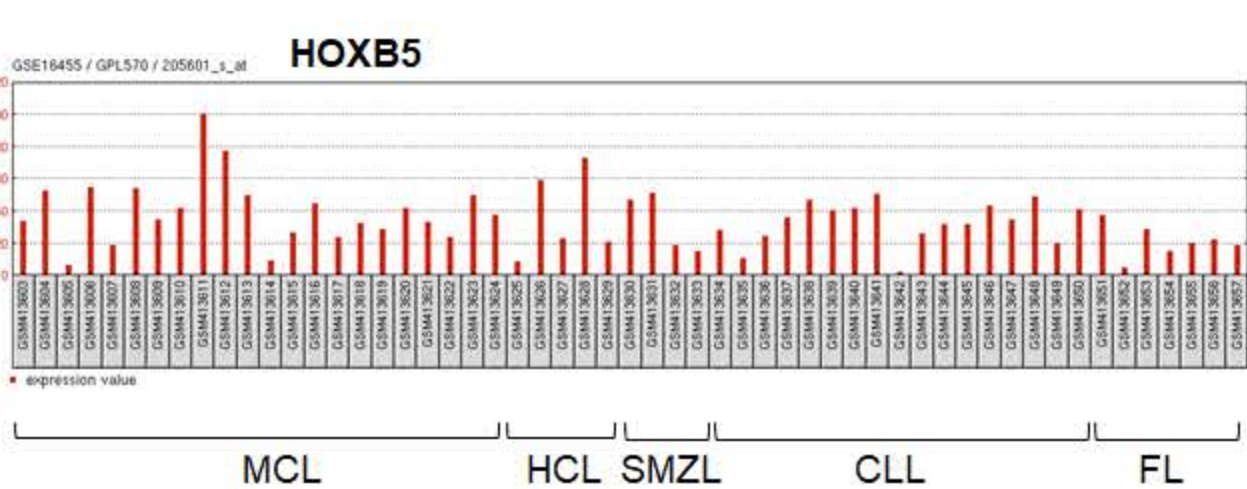

MM (GSE19554)

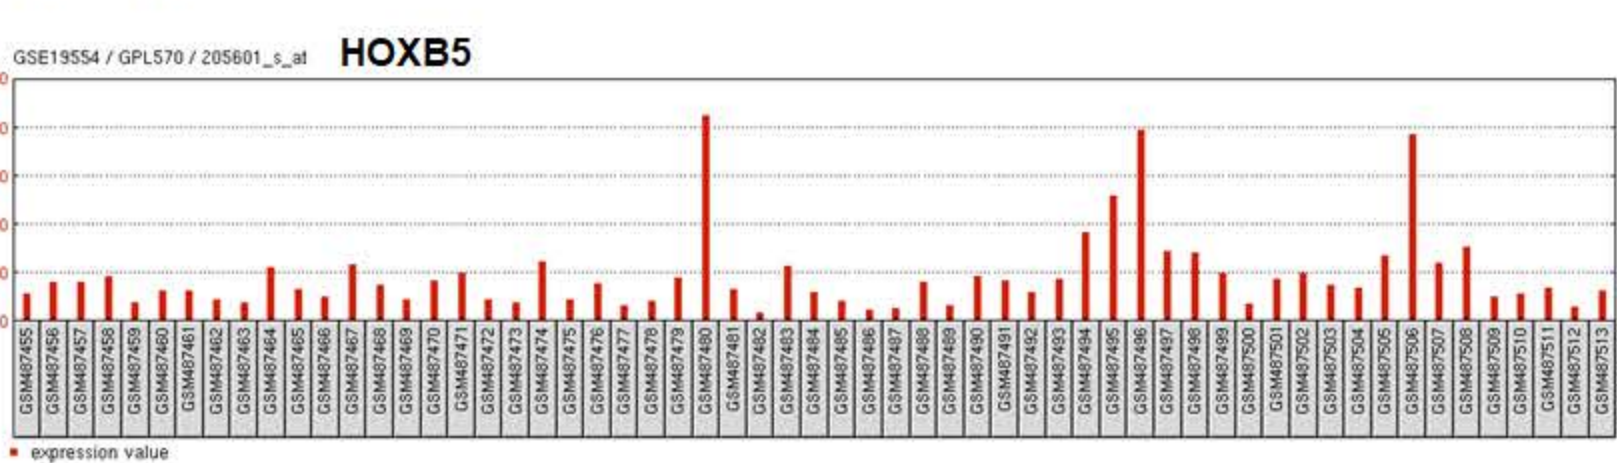

T-ALL (GSE26713)

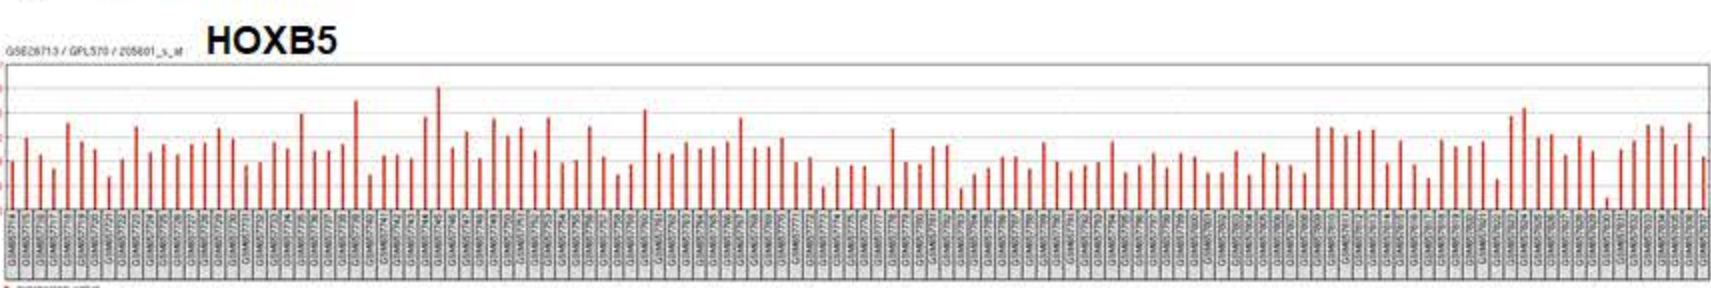

**Supplementary Figure 6:** Expression profiling data for HOXB genes in leukemia/lymphoma patients using public datasets.

# Myelopoiesis (GSE42519)

GSE42519 / GPL570 / 205601\_s\_at **HOXB5**

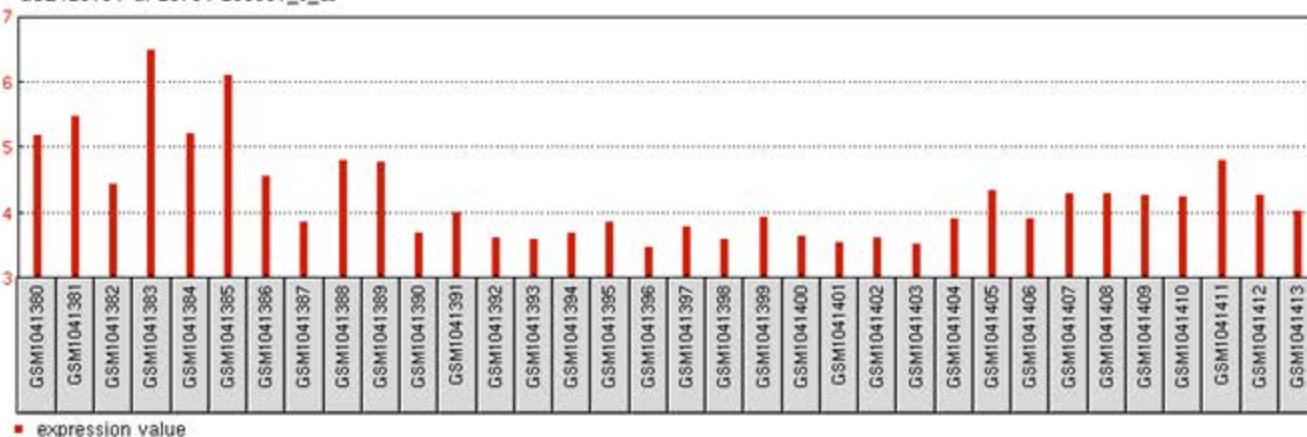

GSE42519 / GPL570 / 226676\_at **ZNF521**

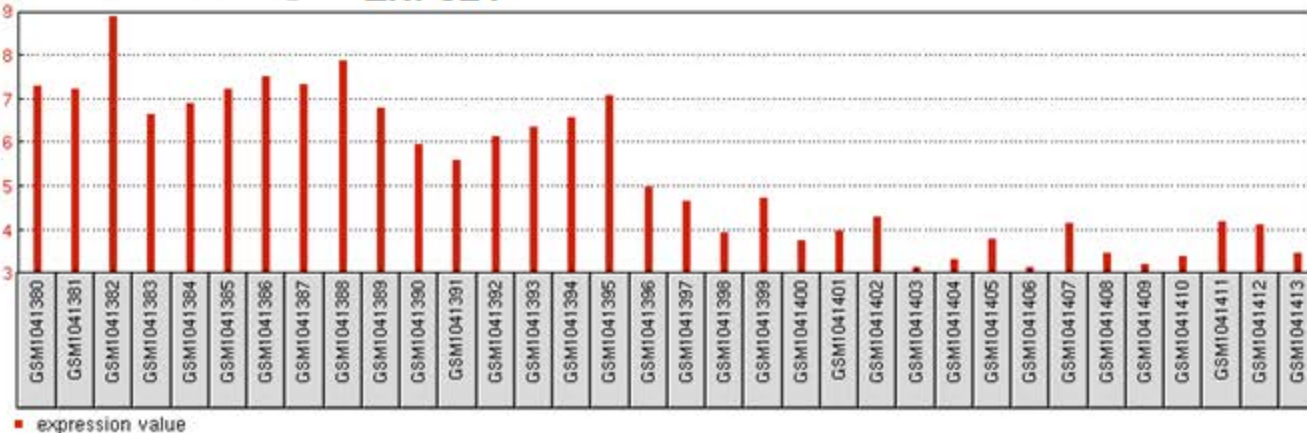

|            |            |
|------------|------------|
| GSM1041380 | HSC 1      |
| GSM1041381 | HSC 2      |
| GSM1041382 | HSC 3      |
| GSM1041383 | HSC 4      |
| GSM1041384 | MPP 1      |
| GSM1041385 | MPP 2      |
| GSM1041386 | CMP 1      |
| GSM1041387 | CMP 2      |
| GSM1041388 | CMP 3      |
| GSM1041389 | GMP 1      |
| GSM1041390 | GMP 2      |
| GSM1041391 | GMP 3      |
| GSM1041392 | GMP 4      |
| GSM1041393 | GMP 5      |
| GSM1041394 | MEP 1      |
| GSM1041395 | MEP 2      |
| GSM1041396 | early_PM 1 |
| GSM1041397 | early_PM 2 |
| GSM1041398 | early_PM 3 |
| GSM1041399 | late_PM 1  |
| GSM1041400 | late_PM 2  |
| GSM1041401 | late_PM 3  |
| GSM1041402 | MY 1       |
| GSM1041403 | MY 2       |
| GSM1041404 | MM 1       |
| GSM1041405 | MM 2       |
| GSM1041406 | MM 3       |
| GSM1041407 | BC 1       |
| GSM1041408 | BC 2       |
| GSM1041409 | BC 3       |
| GSM1041410 | BC 4       |
| GSM1041411 | PMN 1      |
| GSM1041412 | PMN 2      |
| GSM1041413 | PMN 3      |

**Supplementary Figure 7:** Expression profiling data for HOXB5 and ZNF521 in primary myelopoiesis (dataset GSE42519).

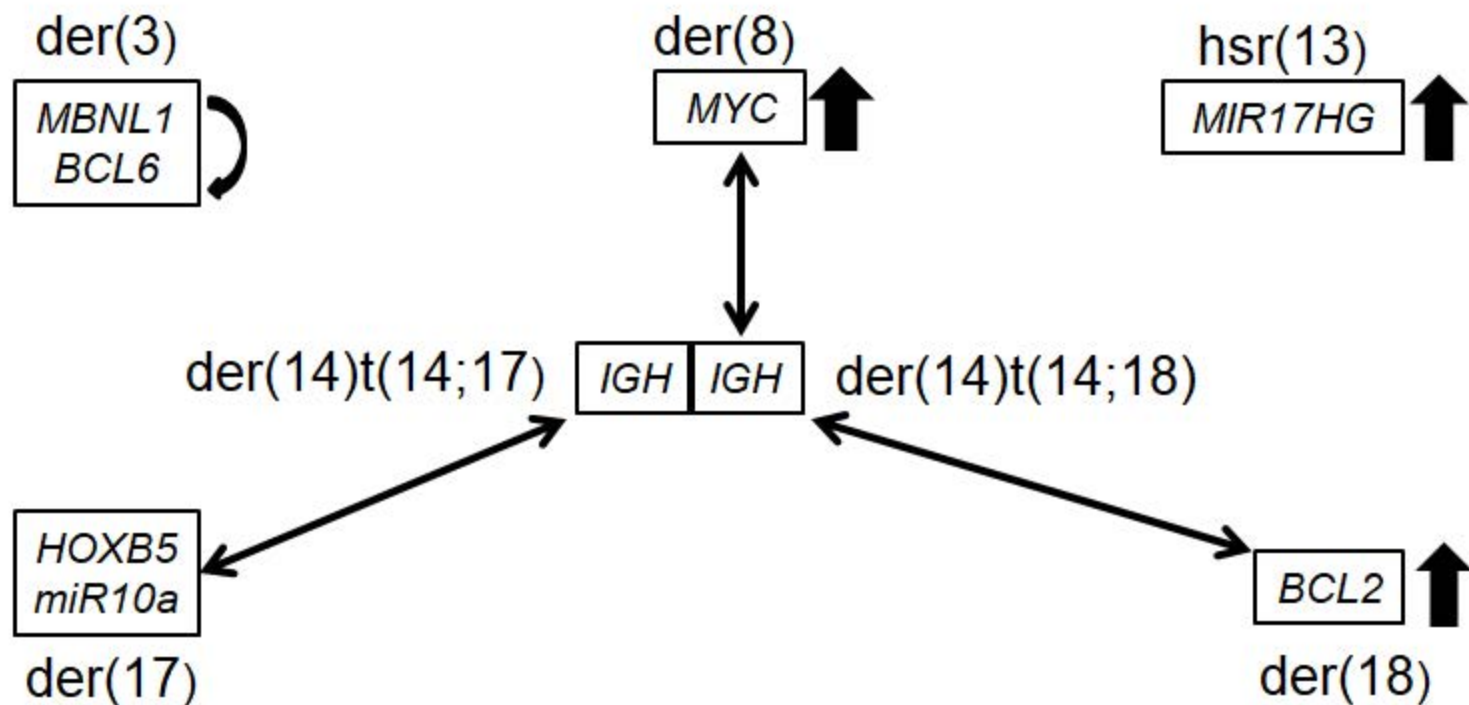

**Suppl. Fig. 8: Key rearrangements present in SC-1**

Diagramme shows multiple coordinated cytogenetic changes in SC-1 and the genes targeted. Note: 1) biallelic *IGH* translocations targeting *MYC*, *HOXB5*, *miR10a*, and *BCL2*; 2) genomic amplification of *MYC*, *MIR17HG* and *BCL2*; and 3) juxtapositional inversion of chr.3 targeting *MBNL1* and *BCL6*.

**Supplementary Table 1**

| Gene ID      | Gene Symbol   | RC-K8 | RI-1  | SC-1  | SU-DHL-4 | SU-DHL-5 | SU-DHL-6 | SU-DHL-10 | SU-DHL-16 | controls | SC1-controls |
|--------------|---------------|-------|-------|-------|----------|----------|----------|-----------|-----------|----------|--------------|
| 201841_s_at  | HSPB1         | 2,07  | 1,18  | 6,06  | -4,44    | -6,23    | 0,63     | -2,63     | -3,32     | -1,82    | 7,88         |
| 213478_at    | KIAA1026      | -7,08 | -2,74 | 2,98  | -3,46    | -5,17    | -3,46    | -8,12     | -3,32     | -4,76    | 7,75         |
| 236523_at    | LOC285556     | -3,01 | -5,16 | 2,28  | -7,83    | -6,12    | -8,12    | -4,21     | -3,32     | -5,40    | 7,68         |
| 202718_at    | IGFBP2        | -1,68 | -3,74 | 3,18  | -6,38    | -4,37    | -5,53    | -6,31     | -3,32     | -4,48    | 7,66         |
| 204971_at    | CSTA          | -2,70 | -1,80 | 4,32  | -2,29    | -3,73    | -3,29    | -5,15     | -3,32     | -3,18    | 7,50         |
| 210993_s_at  | SMAD1         | -6,86 | -2,33 | 3,08  | -5,24    | -4,42    | -2,14    | -6,10     | -3,32     | -4,35    | 7,43         |
| 229349_at    | FLJ16517      | -8,29 | -2,79 | 2,58  | -6,33    | -4,21    | -6,80    | -1,98     | -3,32     | -4,82    | 7,40         |
| 236892_s_at  | LOC404266     | -7,43 | -2,78 | 2,35  | -4,74    | -5,22    | -4,66    | -6,97     | -3,32     | -5,02    | 7,36         |
| 209278_s_at  | TFPI2         | -8,04 | 1,86  | 1,73  | -7,00    | -7,28    | -7,76    | -6,64     | -3,32     | -5,46    | 7,19         |
| 206163_at    | MAB21L1       | -6,08 | -2,45 | 3,03  | -6,04    | -4,56    | -1,20    | -7,43     | 2,20      | -3,65    | 6,69         |
| 210683_at    | NRTN          | -7,00 | -7,12 | -0,07 | -8,20    | -8,58    | -6,51    | -6,20     | -3,32     | -6,70    | 6,64         |
| 226676_at    | <b>ZNF521</b> | -6,24 | -5,56 | 1,62  | -6,93    | -5,84    | -1,11    | -6,10     | -3,32     | -5,01    | 6,63         |
| 213880_at    | LGR5          | -4,40 | -4,57 | 0,67  | -7,16    | -4,54    | -8,38    | -8,97     | -3,32     | -5,91    | 6,57         |
| 239791_at    | LOC404266     | -3,27 | -1,87 | 1,90  | -6,70    | -5,13    | -6,90    | -4,98     | -3,32     | -4,59    | 6,49         |
| 227798_at    | SMAD1         | -7,16 | -3,42 | 2,21  | -4,55    | -4,32    | -3,46    | -3,48     | -3,32     | -4,24    | 6,45         |
| 1559394_a_at | ROR1          | -5,53 | 0,79  | 1,40  | -7,64    | -6,43    | -6,76    | -5,93     | -3,32     | -4,98    | 6,37         |
| 235557_at    | LOC150763     | -5,13 | -5,51 | 0,46  | -6,56    | -6,06    | -6,43    | -7,20     | -3,32     | -5,74    | 6,21         |
| 232760_at    | TEX15         | -6,86 | -6,12 | 0,40  | -4,53    | -6,08    | -8,38    | -4,67     | -3,32     | -5,71    | 6,11         |
| 222921_s_at  | HEY2          | -3,07 | -3,05 | 2,03  | -5,47    | -5,28    | -2,14    | -6,06     | -3,32     | -4,06    | 6,09         |
| 228280_at    | MGC14289      | -4,02 | 1,82  | 2,40  | -3,57    | -3,96    | -5,09    | -6,64     | -3,32     | -3,54    | 5,94         |
| 236163_at    | LIX1          | -3,13 | -5,55 | 0,19  | -7,64    | -6,16    | -8,04    | -6,27     | -3,32     | -5,73    | 5,92         |
| 230487_at    | LOC389440     | -2,12 | -2,53 | 3,15  | -3,22    | -2,16    | -3,44    | -2,77     | -2,86     | -2,73    | 5,88         |
| 205601_s_at  | <b>HOXB5</b>  | -3,41 | -0,47 | 3,28  | -2,01    | -2,39    | -2,05    | -4,98     | -2,69     | -2,57    | 5,85         |
| 201161_s_at  | CSDA          | 2,69  | -5,30 | 2,48  | -6,97    | 1,36     | -5,02    | -6,90     | -3,32     | -3,35    | 5,83         |
| 211796_s_at  | TRBC1         | -6,31 | 4,23  | 4,32  | -0,91    | 0,47     | -1,47    | -3,26     | -3,12     | -1,48    | 5,80         |
| 204749_at    | NAP1L3        | -6,16 | -4,30 | 0,96  | -5,22    | -6,54    | -7,83    | -4,76     | 1,00      | -4,83    | 5,78         |
| 232628_at    | FAM13A1       | -5,16 | -3,81 | 0,56  | -4,37    | -6,05    | -6,27    | -7,64     | -3,19     | -5,21    | 5,77         |
| 219471_at    | C13orf18      | -1,84 | 3,55  | 4,80  | -2,74    | 1,24     | 2,42     | -6,00     | -3,32     | -0,96    | 5,76         |
| 202973_x_at  | FAM13A1       | -2,89 | -4,14 | 1,90  | -6,29    | -3,39    | -5,86    | -3,79     | -0,48     | -3,84    | 5,73         |
| 227792_at    | ---           | -5,44 | -5,64 | 0,58  | -3,86    | -6,42    | -6,76    | -4,15     | -3,32     | -5,09    | 5,67         |
| 208567_s_at  | <b>KCNJ12</b> | -5,88 | -1,39 | 1,05  | -3,85    | -6,18    | -5,49    | -6,02     | -3,32     | -4,59    | 5,64         |
| 226248_s_at  | KIAA1324      | -7,04 | -3,73 | 1,17  | -7,33    | -4,48    | -1,27    | -3,71     | -3,32     | -4,41    | 5,59         |
| 203685_at    | <b>BCL2</b>   | 2,72  | 5,56  | 5,40  | -2,93    | -2,53    | -3,18    | -4,34     | 3,41      | -0,18    | 5,58         |
| 1570445_a_at | LOC441117     | -7,48 | -5,91 | -0,27 | -4,73    | -6,52    | -6,22    | -6,67     | -3,32     | -5,84    | 5,57         |
| 230743_at    | LOC404266     | -4,48 | -2,80 | 1,18  | -3,59    | -3,13    | -6,59    | -6,48     | -3,32     | -4,34    | 5,52         |
| 217728_at    | S100A6        | -5,97 | 0,58  | 1,53  | -5,41    | -0,04    | -7,20    | -6,51     | -3,32     | -3,98    | 5,51         |
| 207110_at    | KCNJ12        | -6,31 | -1,74 | 0,96  | -3,63    | -5,48    | -6,64    | -4,41     | -3,32     | -4,51    | 5,47         |
| 200799_at    | HSPA1A        | -6,73 | -4,87 | 0,57  | -5,67    | 1,10     | -6,59    | -8,48     | -2,98     | -4,89    | 5,46         |
| 1553183_at   | UMODL1        | -8,59 | -4,29 | 1,22  | 0,48     | -5,36    | -4,62    | -3,56     | -3,32     | -4,18    | 5,40         |
| 225564_at    | ---           | -7,43 | -4,14 | 0,67  | -6,31    | -5,49    | -7,20    | 1,15      | -3,32     | -4,68    | 5,35         |
| 205600_x_at  | HOXB5         | -2,59 | -1,47 | 3,48  | -1,46    | -1,15    | -1,63    | -1,47     | -3,31     | -1,87    | 5,34         |
| 242468_at    | ---           | -7,64 | -2,40 | 1,04  | -4,38    | -5,68    | -4,92    | -3,14     | -1,73     | -4,27    | 5,31         |
| 1568619_s_at | LOC162073     | -4,15 | -3,18 | 0,19  | -5,49    | -7,38    | -3,65    | -8,29     | -3,32     | -5,07    | 5,26         |
| 235416_at    | LOC441117     | -6,67 | -5,14 | -0,06 | -5,39    | -4,84    | -4,96    | -6,70     | -3,32     | -5,29    | 5,23         |
| 204918_s_at  | MLLT3         | -0,12 | -1,38 | 2,06  | -7,48    | -0,89    | -2,28    | -7,70     | -2,34     | -3,17    | 5,23         |
